# Supplementary material
Source: publisher figshare collection journal article supplement (https://springernature.figshare.com/ndownloader/files/16832024)
Supplement: Supplementary file 1 [file 16832024]

**Supplemental File 1 - Table S1.** Sequential episodic sub-episode block sum split-integrated weighted average gene overexpression tropy quotients to final *esebssiwaagoT*Q for predicted neural axis gene overexpression by effective intracellular pressure

| Gene Symbol | Final sub-episode block structure |  |  |  |  |  |  |  |  |  |  |  |  |  |
| --- | --- | --- | --- | --- | --- | --- | --- | --- | --- | --- | --- | --- | --- | --- |
| *UNC13A* | 2 M 5 (-2) ACM | 0.203 | 0.467 | **0.434** |  |  |  |  |  |  |  |  |  |  |
| *RGS21* | 2 M 5 | 0.354 | 0.188 | 0371 | 0347 | **0.413** |  |  |  |  |  |  |  |  |
| *SOX1* | 2 M 5 (+2) ACM q terminal end | 0.316 | 0.266 | 0.255 | 0.264 | 0.249 | 0.244 | **0.318** |  |  |  |  |  |  |
| *NGB* | 3 A 7 (-2) stIMfA NCA | 0.083 | 0.384 | 0.401 | 0.340 | **0.305** |  |  |  |  |  |  |  |  |
| *SHANK2* | 6 A 13 | 0.085 | 0.157 | 0248 | 0.299 | 0.254 | 0.302 | 0.315 | 0.311 | 0.301 | 0.282 | 0.270 | 0.306 | **0.301** |
| *RGS2* | 3 M 7 | 0.402 | 0.333 | 0.493 | 0.410 | 0.400 | 0.311 | **0.298** |  |  |  |  |  |  |
| *RGS16* | 3 M 7 (-2) NCA | 0.448 | 0.343 | 0.322 | 0.258 | **0.251** |  |  |  |  |  |  |  |  |
| *DRD1* | 3 A 7 (+1) ACM | 0.121 | 0.239 | 0.256 | 0.236 | 0.243 | 0.234 | 0.229 | **0.249** |  |  |  |  |  |
| *SOX14* | 3 A 7 | 0.134 | 0.234 | 0.263 | 0.271 | 0.225 | 0.232 | **0.219** |  |  |  |  |  |  |
| *DRD2* | 2 A 5 | 0.098 | 0.146 | 0.161 | 0.187 | **0.217** |  |  |  |  |  |  |  |  |
| *RBFOX3* | 5 M 11 (+2) ACM | 0.426 | 0.211 | 0.258 | 0.255 | 0.270 | 0.290 | 0.267 | 0.277 | 0.260 | 0.224 | 0.213 | 0.224 | **0.213** |
| *RGS18* | 4 M 9 (+2) ACM | 0.469 | 0.401 | 0.401 | 0.338 | 0.330 | 0.314 | 0.289 | 0.208 | 0.203 | 0.217 | **0.205** |  |  |
| *GRIN1* | 2 M 5 | 0.507 | 0.167 | 0.192 | 0.215 | **0.203** |  |  |  |  |  |  |  |  |
| *DRD3* | 4 A 9 | 0.102 | 0.141 | 0.172 | 0.225 | 0.188 | 0.179 | 0.193 | 0.192 | **0.203** |  |  |  |  |

1) Gene loci sub-episode block structure variations include non-contributory anisotropy (NCA), anisotropy converted to mesotropy (ACM), and/or 0.5-factor adjusted stabilizing mesotropy or anisotropy converted to stabilizing isotropy for anisotropy or mesotropy (stIAfM, stIMfA or stIMfM) that result in an initial to final SEB conversion; and 2) previously reported episode and sub-episode block structure is applied in all cases as per reference [25], in which gene/gene loci at cusps of the delineated base intervals, *SHANK2* (784,883), *RBFOX3* (521,757) classify into the adjacent interval
